# Supplementary material
Source: PubMed Central journal article supplement (PMC3074534)
Supplement: NIHMS283210-supplement-01.pdf [file NIHMS283210-supplement-01.pdf]

**ONLINE REPOSITORY****Human Atopic Dermatitis Complicated by Eczema Herpeticum is Associated with Abnormalities in Gamma Interferon Response**

Donald YM Leung MD, PhD,<sup>a,b,i</sup> Pei-Song Gao MD, PhD,<sup>c</sup>

Dmitry N Grigoryev MD, PhD,<sup>c</sup> Nicholas M Rafaels MS,<sup>c</sup> Joanne E Streib BA,<sup>a</sup>

Michael D Howell PhD,<sup>a</sup> Patricia A Taylor NP,<sup>a</sup> Mark Boguniewicz MD,<sup>a,b</sup>

Jennifer Canniff BS,<sup>b</sup> Brian Armstrong MPH,<sup>d</sup> Daniel J Zaccaro MS,<sup>d</sup>

Lynda C Schneider MD,<sup>e</sup> Tissa R Hata MD,<sup>f</sup> Jon M Hanifin, MD,<sup>g</sup> Lisa A Beck MD,<sup>h</sup>

Adriana Weinberg MD, PhD,<sup>b</sup> Kathleen C Barnes PhD<sup>c</sup>

<sup>a</sup>Department of Pediatrics, National Jewish Health, 1400 Jackson St, Denver, CO 80206

<sup>b</sup>Department of Pediatrics, University of Colorado Denver, 13123 E. 16<sup>th</sup> Ave,

Aurora CO 80045

<sup>c</sup>Johns Hopkins Asthma & Allergy Center, Johns Hopkins University School of Medicine, 5501

Hopkins Bayview Circle, Baltimore, MD 21224

<sup>d</sup>Rho Inc., 6330 Quadrangle Dr, Suite 500, Chapel Hill, NC 27517

<sup>e</sup>Children's Hospital Boston, 300 Longwood Avenue, Boston, MA 02115

<sup>f</sup>UCSD Medical Center, 200 West Arbor Drive MC 8201, San Diego, CA 92103

<sup>g</sup>Oregon Health & Science University, 3303 SW Bond Ave, Portland, OR 97239-4501

<sup>h</sup>Department of Dermatology, University of Rochester Medical Center, Rochester, NY 14642

**SUPPLEMENTAL FIGURES**

**FIG E1.** Gene structure and LD estimation for 8 *IFNG* SNPs in a European American population. The top panel is the *IFNG* structure containing 4 exons (in purple) spanning a region of 13.1 kb. (Filled circles represent the SNPs associated with IFN $\gamma$  production). Diamonds without a number correspond to  $D'=1$ ; shading represents LD with a red to white gradient reflecting higher to lower  $D'$  values

**FIG E2.** Mean levels of the  $\log_{10}$ -transformed SFC/ $10^6$  cells in mock- and HSV-treated PBMCs from European Americans (EA) and African Americans (AA).

Haplotype TGTA,  $P = 0.0027$

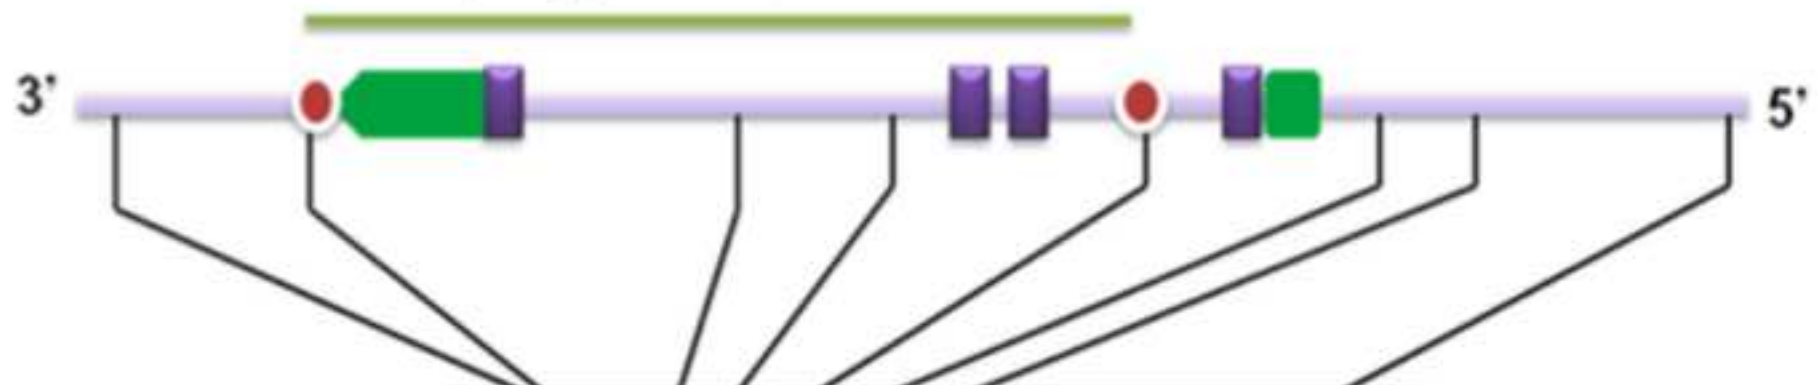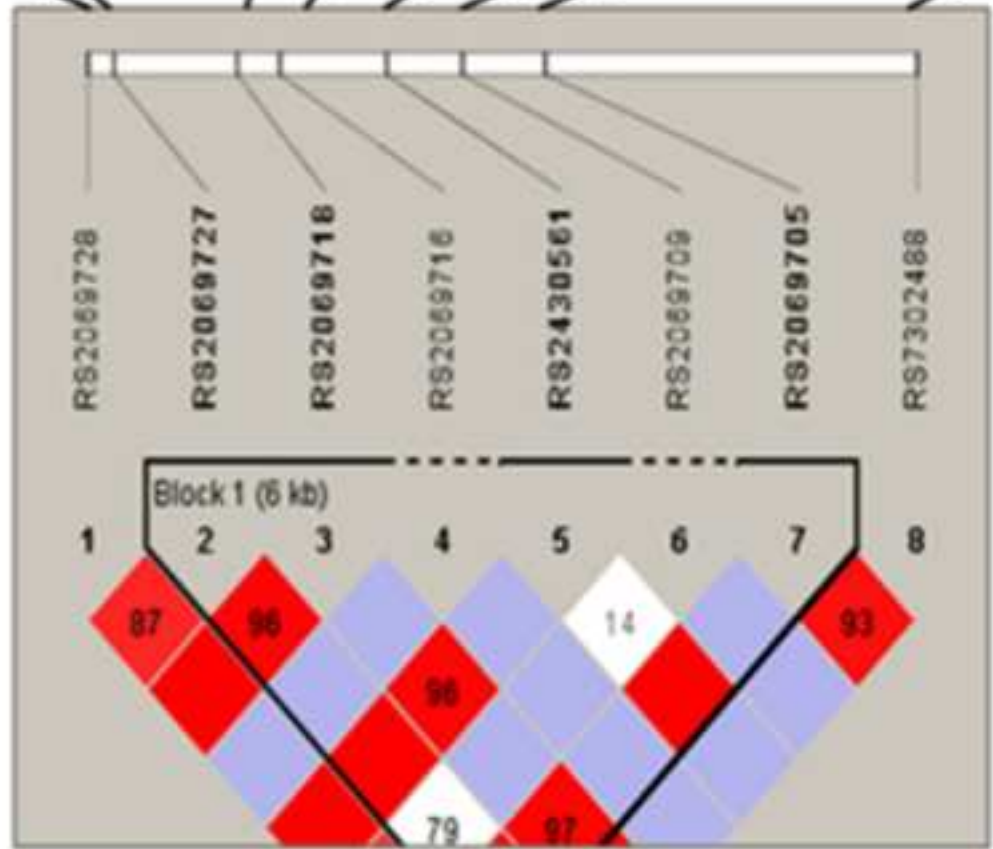

IFN-gamma, 13.1-Kb

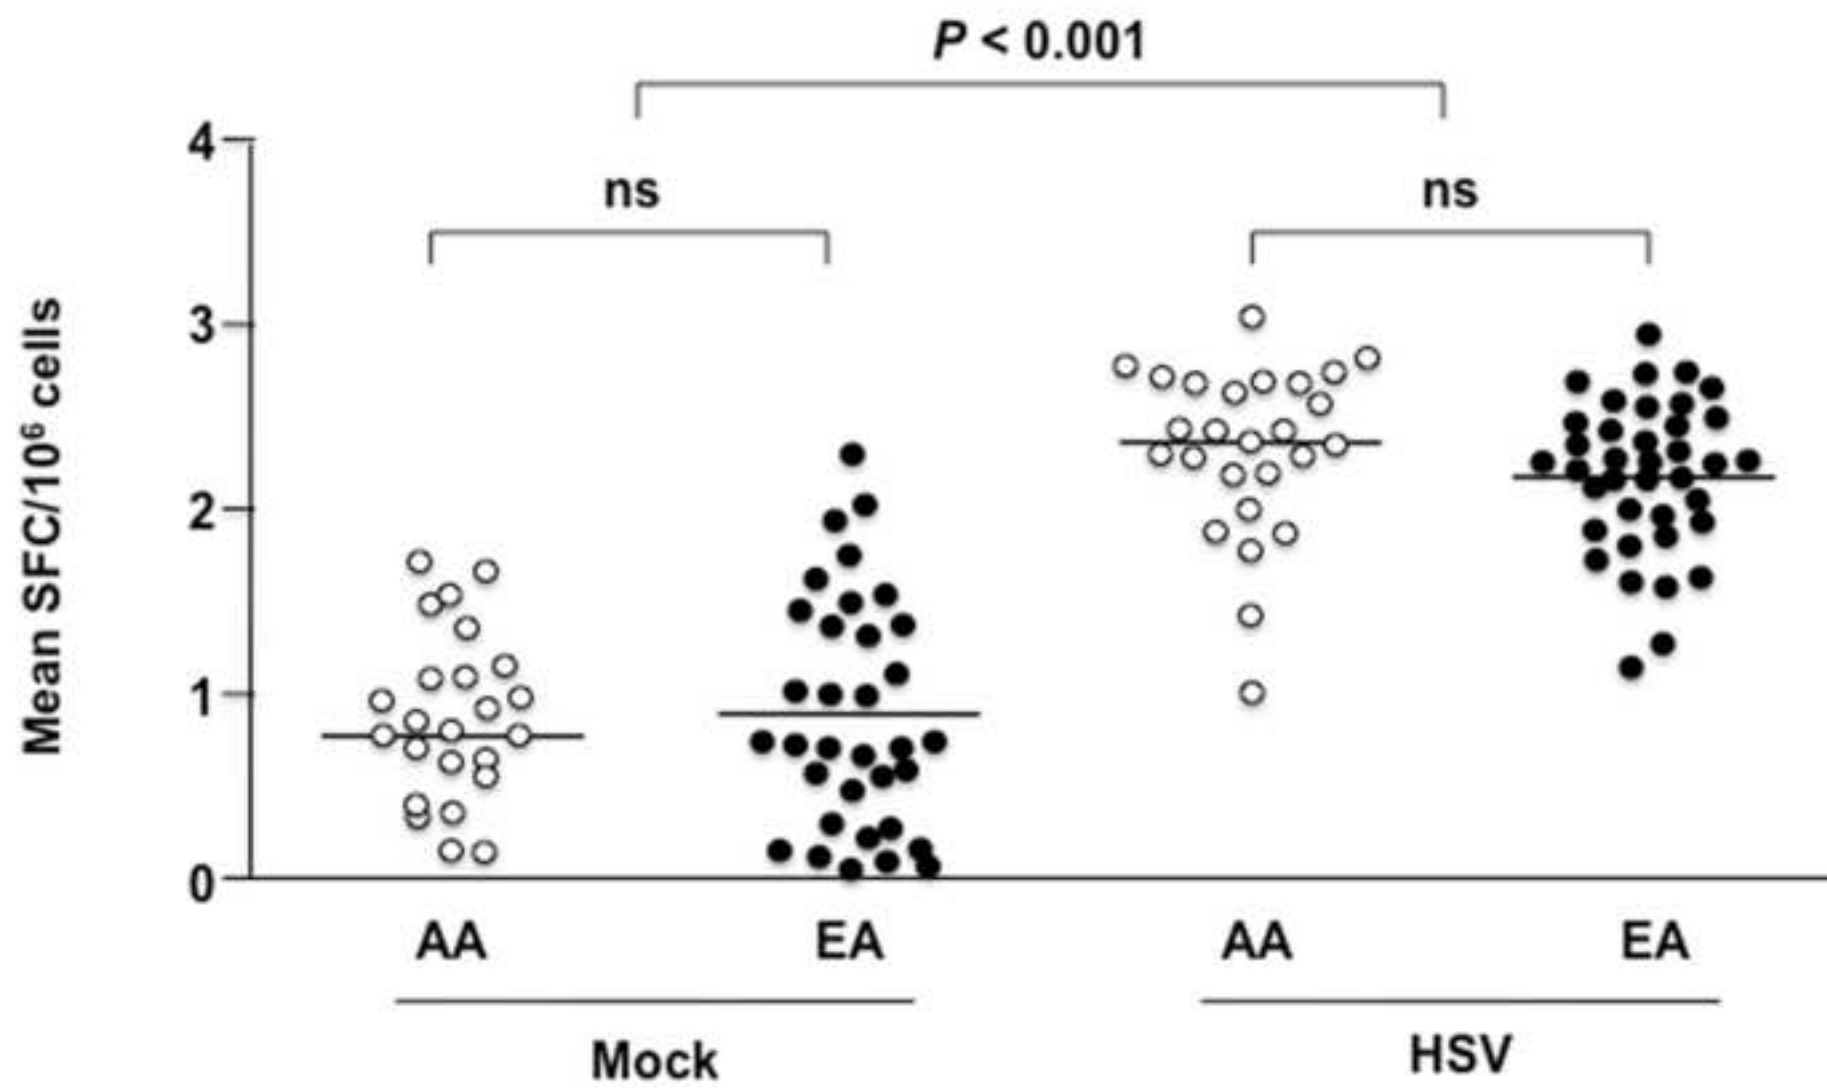

**TABLE EI.** Clinical characteristics of participants in cell mediated immunity studies

|                  |            | <b>ADEH+</b>  | <b>ADEH-</b> | <b>NA</b>     |
|------------------|------------|---------------|--------------|---------------|
| Age (yrs)        | <b>N</b>   | <b>24</b>     | <b>20</b>    | <b>20</b>     |
|                  | Mean SD    | 21.65 (15.42) | 42.3 (10.35) | 40.55 (10.50) |
|                  | Median     | 17.7          | 44.3         | 38.25         |
|                  | (Min, Max) | (1.62,59.2)   | (22.2, 54.7) | (27.3, 56)    |
| <hr/>            |            |               |              |               |
| Female           | N (%)      | 11 (45.8%)    | 15 (75.0%)   | 12 (60.0%)    |
| Male             | N (%)      | 13 (54.2%)    | 5 (25.0%)    | 9 (45.0%)     |
| <hr/>            |            |               |              |               |
| African American | N (%)      | 5 (20.8%)     | 10 (50.0%)   | 11 (55.0%)    |
| Caucasian        | N (%)      | 19 (79.2%)    | 10 (50.0%)   | 9 (45.0%)     |

**TABLE EII.** Clinical characteristics of participants in genetics association studies  
of *IFNG* SNPs

| Characteristic               | European American    |                    |                 |
|------------------------------|----------------------|--------------------|-----------------|
|                              | ADEH+                | ADEH-              | NA              |
| Sample size                  | 112                  | 166                | 157             |
| Males; N<br>(%)              | 58<br>(53.7%)        | 49<br>(29.7%)      | 63<br>(40.1%)   |
| Age; mean<br>(SD)            | 22.9<br>(22.1)       | 38.4<br>(14.6)     | 36.5<br>(13.2)  |
| Total IgE, Mean*<br>(95% CI) | 2,083<br>(1399-3100) | 366.7<br>(261-516) | 55.5<br>(44-69) |
| EASI, Mean†<br>(95% CI)      | 7.4<br>(6.0-9.1)     | 3.5<br>(2.9-4.3)   | ND              |

The following abbreviations are used: ADEH-, atopic dermatitis without eczema herpeticum; ADEH+, atopic dermatitis with eczema herpeticum; EASI, Eczema area and severity index; and ND, not done.

\*Geometric mean serum levels of total IgE.

†EASI determined by the percentage of eczema area on a 7-point ordinal scale: 0 =<10%; 1=10%-29%; 3=30%-49%; 4=50%-69%; 5=70%-89%; and 6=90%-100%.

and *IFNGRI* in the European American healthy controls (n=157).

**TABLE EIII.** SNP position, allele, role and minor allele frequency (MAF) of *IFNG* and *IFNGRI* in the European American NA controls (n=157)

| SNP                             | SNP position | Distance from previous SNP | Alleles | Location             | Minor allele frequency |
|---------------------------------|--------------|----------------------------|---------|----------------------|------------------------|
| <b><u>IFNG (chr12q14)</u></b>   |              |                            |         |                      |                        |
| rs7302488                       | 66847146     |                            | G/T     | Promoter             | 0.23                   |
| rs2069705                       | 66841278     | 5868                       | C/T     | Promoter             | 0.36                   |
| rs2069709                       | 66839970     | 1308                       | G/T     | Promoter             | 0.02                   |
| rs2430561                       | 66838787     | 1183                       | A/T     | Intron               | 0.36                   |
| rs2069716                       | 66837082     | 1705                       | A/G     | Intron               | 0.05                   |
| rs2069718                       | 66836429     | 653                        | C/T     | Intron               | 0.48                   |
| rs2069727                       | 66834490     | 1939                       | A/G     | Downstream           | 0.34                   |
| rs2069728                       | 66834051     | 439                        | A/G     | Downstream           | 0.15                   |
| <b><u>IFNGRI(chr6q23.3)</u></b> |              |                            |         |                      |                        |
| rs2234711                       | 137582213    |                            | C/T     | Promoter             | 0.44                   |
| rs7749390                       | 137582063    | 150                        | A/G     | Intron<br>(boundary) | 0.44                   |
| rs10457655                      | 137581503    | 560                        | A/G     | Intron               | 0.23                   |
| rs9376269                       | 137581198    | 305                        | C/G     | Intron               | 0.20                   |
| rs1327475                       | 137578148    | 3050                       | C/T     | Intron               | 0.14                   |
| rs3799488                       | 137561473    | 16675                      | C/T     | Intron<br>(boundary) | 0.07                   |
